# Supplementary material for: Ablative Therapies in Metastatic Breast Cancer: A Systematic Review
Source: Springer Nature journal article supplement (doi:10.1007/s10549-017-4228-2), 2017-04-11
Supplement: MOESM1 [file 12212616]

**Online Resource 1** – PRISMA Flow Diagram
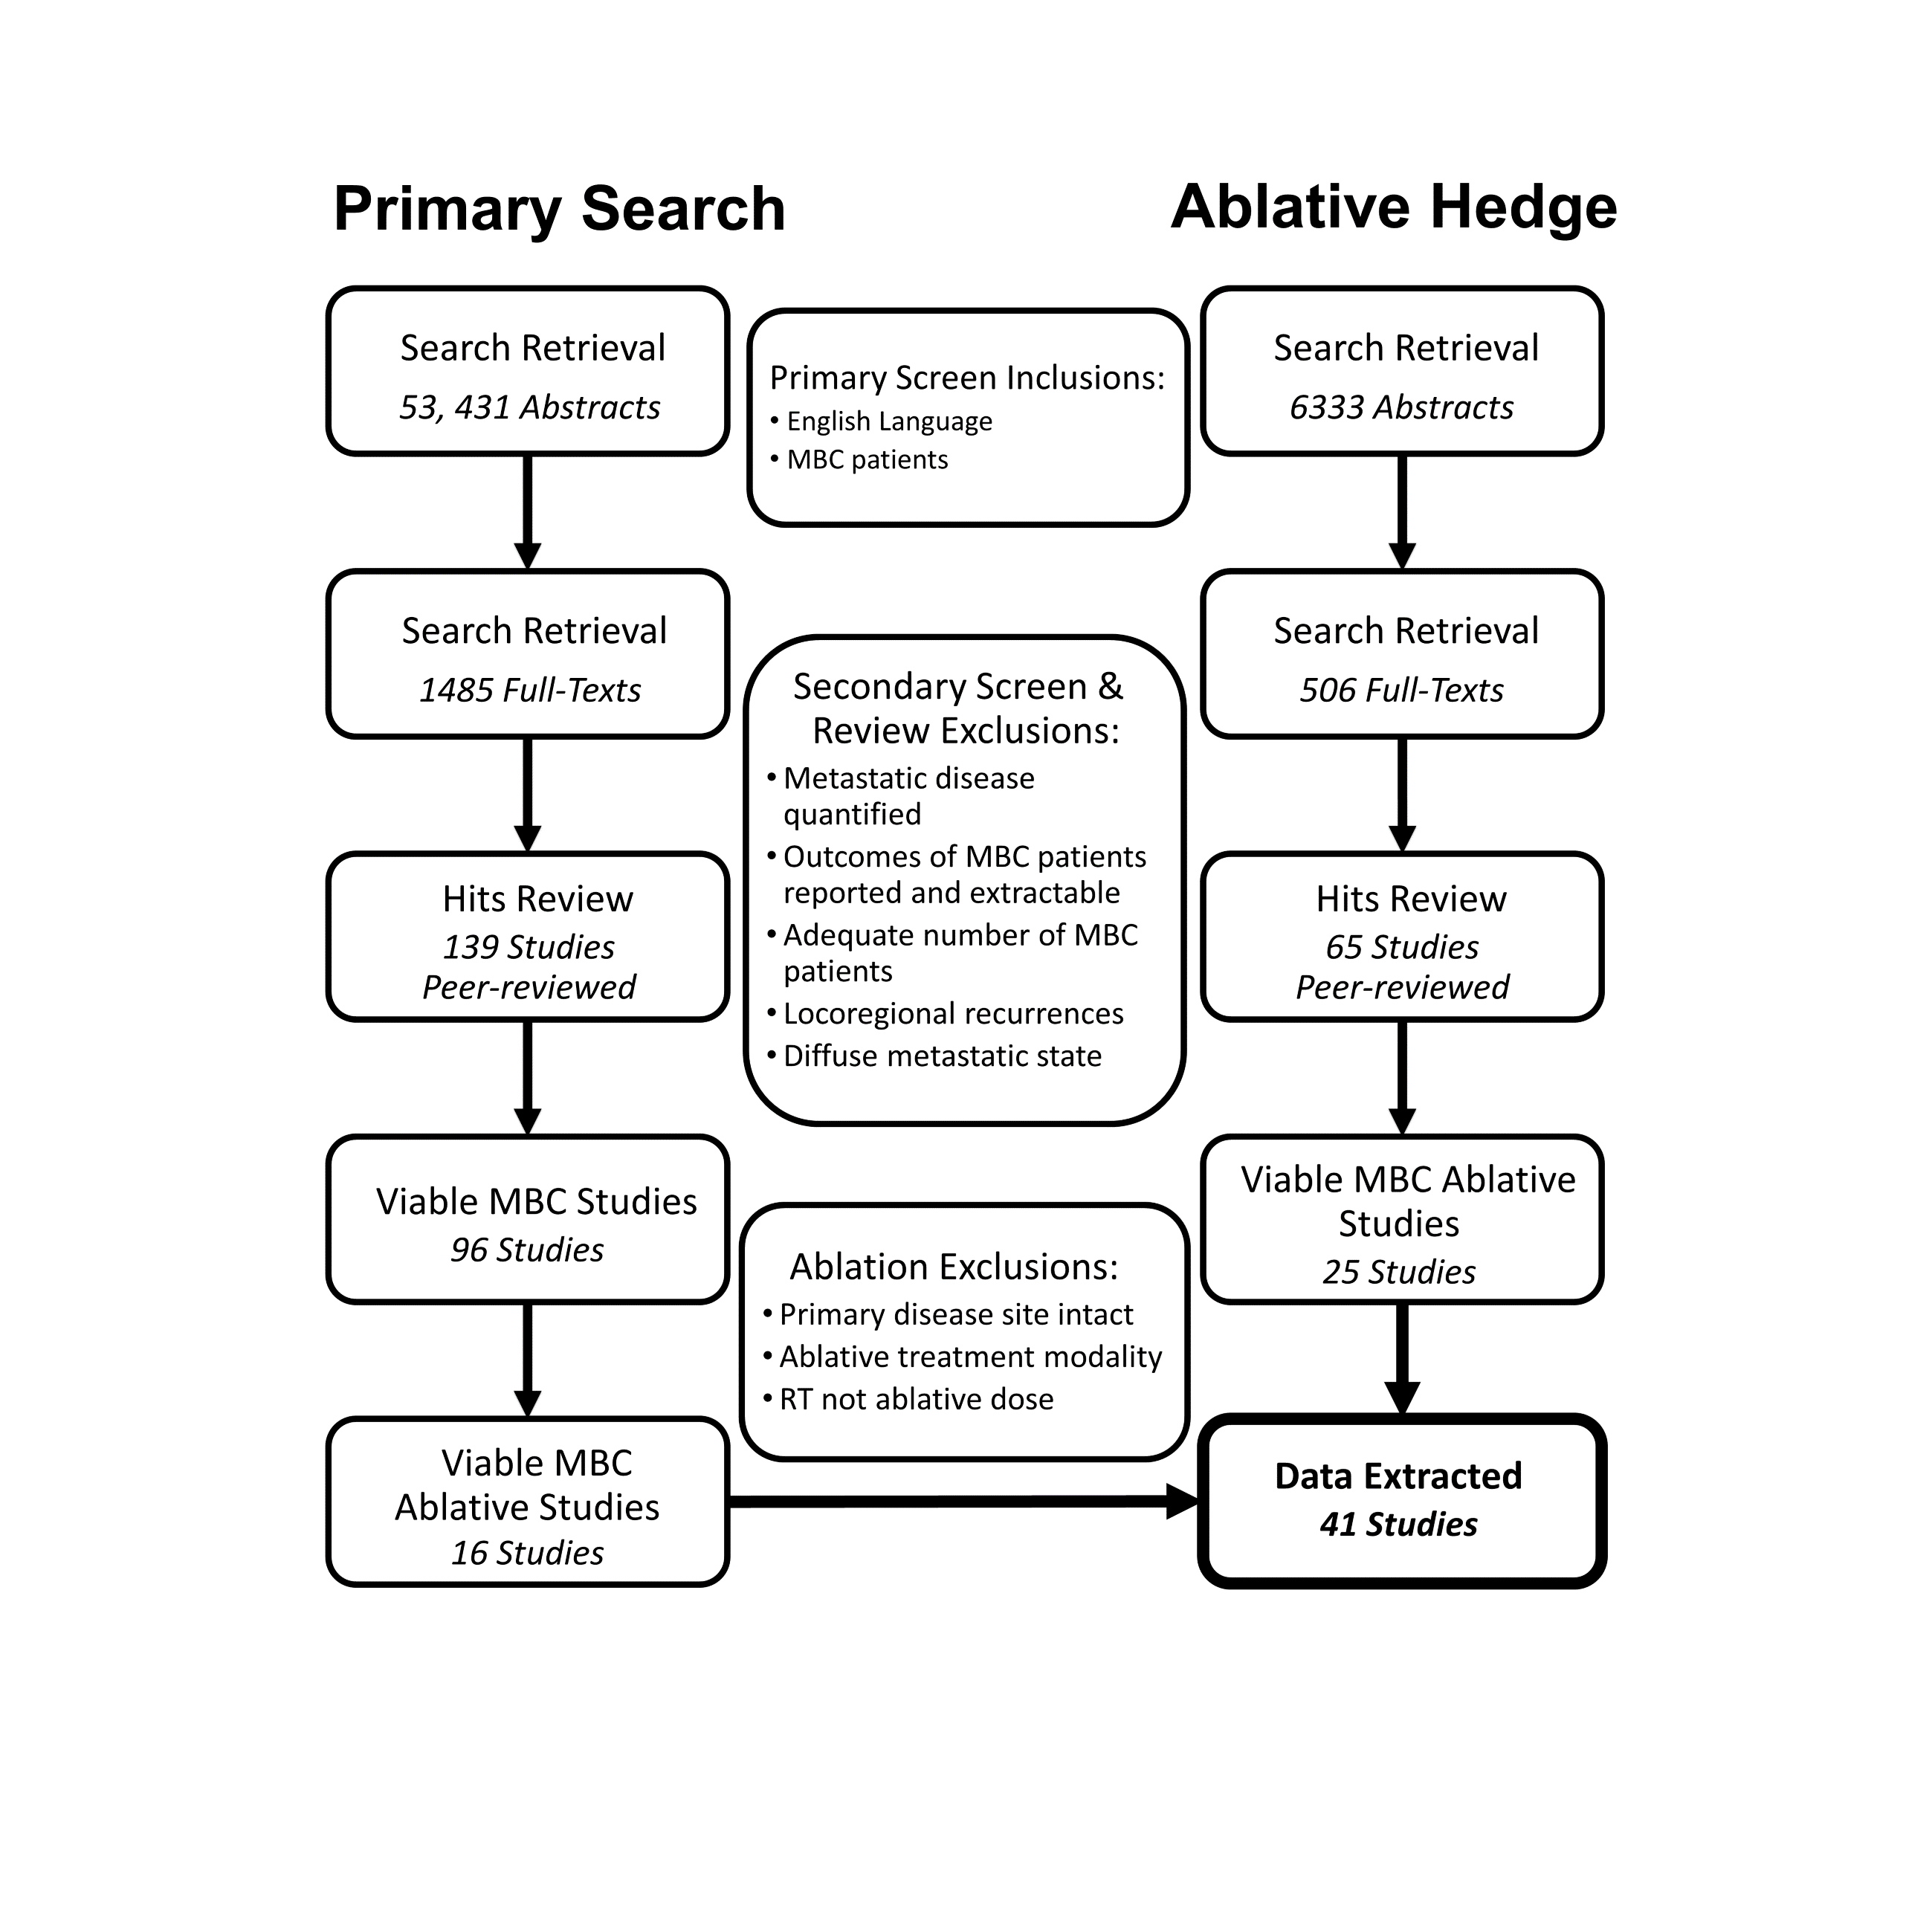


**Online Resource Abbreviations:**

HR- hazard ratio; KPS – Karnofsky Performance Score; MBC – metastatic breast population; mOS – median overall survival; OMBC –oligometastatic breast cancer definition; VATS – video assisted thorascopic surgery

**Online Resource 2** **– Caveats for Study Inclusion**

| Reference | Inclusion Criteria | Exclusion Criteria | Rationale for Inclusion |
| --- | --- | --- | --- |
| Geiger S et al  (2011) 26 | Failed – Did not define their OMBC population explicitly | Passed | Use of the term OMBC implied that all residual disease was surgically excised | |
| Kobayashi T et al (2012) 8 | Failed – radiotherapy was not clearly an ablative dose | Passed | Full text implied that an ablative dose was utilized in place of or in addition to surgery. | |
| Meimarakis G et al (2013) 18 | Passed | Failed – synchronous metastases in 10% of population | Synchronous metastases patients were a significant minority with similar outcomes (*p*=0.175)U and the study contributed a significant quantity of data | |
| Milano M et al (2009) 27 | Failed – patient population was already reported in another inclusion43 | Passed | Subpopulation analyses present in this publication were not present in the subsequent publication already included | |
| Zegarac M et al (2013) 62 | Passed | Failed – synchronous metastases in 3 of 32 patients | Synchronous metastases patients were a significant minority with similar outcomes (*p*= not significant) | |

U – Assessed by univariate analysis

**Online Resource 3 – Margin Status**

| Reference | Therapy | Patients (*n*) | MBC Population | Surgical Extent | mOS (months) | | HR  (95% CI) | *p* value |
| --- | --- | --- | --- | --- | --- | --- | --- | --- |
| Meimarakis G et al (2013) 18 | Metastectomy | 66  15 | Lung only | Negative margins Positive margins | | 103.4  - | 3.3 (1.4–8.0) | 0.008 M |
| Friedel G et al (2002) 19 | Metastectomy | 392  75 | Lung only | Negative margins  Positive margins | | 37  25 | - | 0.0009 U |
| Kycler W et al (2012) 52 | Metastectomy | 33 | Lung only | Negative margins Positive margins | | -  - | - | 0.0275 U |

M - as assessed by multivariate analysis
U – as assessed by univariate analysis, included when multivariate analysis not presented

**Online Resource 4 – Type of Surgery**

| Reference | Therapy | Patients (*n*) | MBC Population | Surgery Type | mOS (months) | HR  (95% CI) | *p* value |
| --- | --- | --- | --- | --- | --- | --- | --- |
| Martinez SR et al (2006) 56 | Metastectomy | 13  7 | Liver only | Anatomic resection ±   hepatic ablation  Limited hepatic  resection | 25  46 | - | 0.016 U |
| Lubrano J et al (2008) 55 | Hepatectomy | 9  7 | Liver only | ≥4 liver segments <4 liver segments | 28  36 | - | 0.001 U |
| Friedel G et al (2002) 19 | Metastectomy | 234  98  51  5 | Lung only | Wedge resection Lobectomy Segmental resection  Pneumonectomy | 42  36%*  34%*  10 | - | NS U |
| Friedel G et al (2002) 19 | Metastectomy | 79  283 | Lung only | Sternotomy  Unilateral   thoracotomy | 36  39 | - | - |
| Meimarakis G et al (2013) 18 | Metastectomy | 71  10 | Lung only; complete resection | Single operation  Re-operation | 82.4  47.2 | - | 0.33 U |
| Chen F et al (2009) 47 | Metastectomy | 27  14 | Lung only | Open thoracotomy  VATS | 74.1%*  49.1%* | - | 0.66U |
| Chen F et al (2009) 47 | Metastectomy | 26  15 | Lung only | Between 1991-99 Between 2000-07 | 52.5%* 0% * | - | 0.72 U |
| Staren ED et al (1992) 58 | Metastectomy | 33 | Lung only | Wedge resection or  segmental resection  Lobectomy or   pneumonectomy | -  - | - | NS |

* - Five-year OS reported in place of mOS, due to availability
U – Assessed by univariate analysis
M – Assessed by multivariate analysis
